# Supplementary material
Source: Springer Nature journal article supplement (https://www.springermedizin.de/resource/supplementary/12903_2014_392_MOESM3_ESM.pdf/9516936)
Supplement: MOESM3 [file 9516936]

**Figure 1 – Details of inclusion / exclusion criteria**

| <b><u>Inclusion</u></b>                                                                    | <b><u>Exclusion</u></b>                                               |
|--------------------------------------------------------------------------------------------|-----------------------------------------------------------------------|
| Published between January 1970 and February 2013                                           | Published prior to 1970                                               |
| Published in English and full-text accessible                                              | Articles which were not available in English or full text unavailable |
| Content directly relevant to dentistry or related disciplines                              | Not concerned with the field of dentistry                             |
| Articles investigating the conceptual framework or dimensions of patient-centred care      | Articles not directly related to “patient-centred care”               |
| Any publication undertaking primary research into PCC irrespective of type of study design | Opinion articles, reviews or reports of non-original research         |
